# Supplementary material for: Effects of thalamic infarction on the structural and functional connectivity of the ipsilesional primary somatosensory cortex
Source: Springer Nature journal article supplement (doi:10.1007/s00330-019-06068-0), 2019-03-06
Supplement: MOESM1 [file 16529582]

**Effects of thalamic infarction on the structural and functional connectivity of the ipsilesional primary somatosensory cortex**

**Supplemental material**

***Definition and grade of white matter hyperintensities (WMHs)***

The definition and rating of the white matter hyperintensities (WMHs) [1] are presented as follows. The WMHs are areas with a high intensity on types of MRI scans in the white matter region. WMHs are commonly observed on T2-weighted (T2), proton density-weighted (PD), and fluid-attenuated inversion recovery (FLAIR) MRI sequences. WMHs are often divided into the following categories: periventricular WMHs (PVWMHs) [2], which are adjacent to the cerebral ventricles, and deep WMHs (DWMHs) [2], which are patchy areas of WMH in subcortical white matter distinct from the periventricular area. The Fazekas rating scale was used to describe the different types of hyperintense signal abnormalities surrounding the ventricles and in the deep white matter. PVWMH was graded as follows: 0 = absence, 1 = “caps” or pencil-thin lining, 2 = smooth “halo”, or 3 = irregular PVWMH extending into the deep white matter. DWMH was rated as follows: 0 = absence, 1 = punctate foci, 2 = beginning confluence of foci, or 3 = large confluent areas. Two blinded and trained raters manually assessed the WMHs.

***Data preprocessing***

The preprocessing process of multi-model MRI data preprocessing steps are the Figure S1.

Figure S1. Flow chart of the preprocessing of the DTI, 3D-T1 and resting-state fMRI data.

***Preprocessing of the DTI data***

The DTI data were preprocessed using FMRIB’s free software FSL (Oxford Center for Functional MRI of the Brain). All diffusion-weighted images were visually inspected by 2 radiologists for apparent artifacts due to subject motion and instrument malfunction. In each examination of each subject, the diffusion-weighted images were registered to the corresponding b = 0 images with an affine transformation to correct for eddy-current distortion and motion displacement. Then, the skulls in the images were removed using the brain extract toolbox. The diffusion tensor was reconstructed using the linear least-square fitting algorithm [3], which was used to calculate the diffusion indices, including fractional anisotropy (FA), 3 eigenvectors, and mean diffusivity. Deterministic fiber tracking was applied using a fiber assignment by a continuous tracking algorithm with an angle threshold of 50°.

The left S1 region was extracted from Brodmann’s areas 1, 2, and 3 in the Brodmann atlas. The WFU_PickAtlas Toolkit (www.ansir.wfubmc.edu) was used to identify the thalamus and S1 as regions of interests (ROIs). Given that the ROIs (i.e., left thalamus and left S1) were derived from a normalized Montreal neurological institute (MNI) space, an inverse transformation of the spatial normalization was applied to acquire the ROIs in the native space of DTI [4]. The inverse transformation (T-1) was specifically applied to the ROIs in normalized MNI, thereby resulting in subject-specific ROIs in the native space of DTI. Then, fiber bundles connecting the left thalamus and left S1 were extracted from the total collection of brain fibers. An ROI drawing (i.e., between the left thalamus and left S1) was placed along the trajectory of the fiber tract to extract fibers through the ROI logic operation “AND”. The fiber tracking methods were carefully devised to achieve high accuracy and high inter-rater reliability.

Tractography was performed in all healthy controls. We co-registered the individual diffusion indices and tracts into an MNI space using a 2-step method. First, we co-registered the brain-extracted b0 images of each subject with T1 images using an affine method (12 parameters); then, the T1 images were affinely co-registered into the T1 template of the MNI space. Finally, the diffusion indices and reconstructed tracts were written into the MNI space using the affine parameters generated from the above steps and resliced into 2×2×2 mm3. The resulting tracts of all healthy subjects were used to calculate the probability map of each tract of interest. The final probability maps were calculated as the mean probability of tractography. Then, the 25% probability was used to generate the ipsilateral CTR.

The values of eigenvalues, such as λ1, λ2 and λ3, were extracted. Mean diffusivity (MD) and fractional anisotropy (FA) are commonly used indices reflecting the average amplitude and directionality of molecular motion, respectively. The primary eigenvalue (λ1) is the diffusion coefficient along the direction of maximum diffusion. The transverse eigenvalue (λ23) is generated by averaging the medium (λ2) and minimum eigenvalues (λ3), thus avoiding sorting bias due to similar magnitudes between λ2 and λ3. Then, the FA values were extracted from the masks of the CTR for the patients with TI and the healthy controls. FA values can accurately estimate the white matter integrity only in white matter regions with coherent fiber arrangement. Therefore, only the FA values of the midsagittal slice (or the middle 10 mm section) of the CTR were extracted. We used the mean FA value of all voxels within each ROI to represent the FA of the CTR. The following formula was used:

FA =

MD =

Axial Diffusivity (AD) =

Radial Diffusivity (RD) =

***Cortical volume preprocessing***

The cortical volume was calculated with the automatic pipeline of FreeSurfer V.5.3.0 (Martinos Center for Biomedical Imaging center, MGH, http://surfer.nmr.mgh.harvard.edu/) [5, 6]. The images were sequentially preprocessed as follows: skull stripping using a watershed/surface deformation procedure to remove nonbrain tissue [7]; transformation into the Talairach space; segmentation of the subcortical white and gray matter structures; intensity normalization to correct the nonuniformity of the MR intensity mainly caused by variations in reception coil sensitivity and gradient-driven eddy currents [8]; tessellation of the gray matter/white matter boundaries; automated topology correction [9, 10]; and surface deformation following intensity gradients to optimally place the gray/white and gray/cerebrospinal fluid borders that most accurately define the transition to the other tissue class [11, 12]. Prior to the statistical analyses, the cortical volume of each subject was presmoothed with a 10 mm, full-width half-maximum (FWHM) Gaussian kernel. In addition, the brain images were overlaid with pial and white matter surfaces to verify the quality of the surface reconstruction.

***Resting-state FC preprocessing***

The resting-state fMRI data were preprocessed with SPM8 (Wellcome Centre for Human Neuroimaging, UCL, http://www.fil.ion.ucl.ac.uk/spm/software/spm8/). The first ten volumes of each subject were discarded to allow the signal and subject to reach equilibrium and adapt to the scanning noise, respectively. The remaining 230 volumes were first corrected for the acquisition time delay across different slices. After the slice-timing adjustment and realignment for head motion correction, any data affected by head motions greater than 2.5 mm or a rotation greater than 2.5° were excluded. The group differences in the translation and rotation of head motion were evaluated. The patient and healthy control groups did not significantly differ in terms of head motion and rotation (i.e., two-sample, two-tailed t-test, *t* = 1.155, *p* = 0.253). All data were spatially normalized and resampled following the standard EPI template and 3 × 3 × 3 mm3 voxels, respectively. After the resampling, all images were spatially smoothed with a Gaussian kernel (FWHM = 8 mm). Several sources of spurious variances, including estimated motion parameters (Frison 24 regressors, including 6 head motion parameters, 6 head motion parameters 1 time point before, and 12 corresponding squared items) [13] and average signals in the ventricular and white matter regions, were removed from the data through a linear regression. Finally, band-pass filtering (0.01-0.1 Hz) was conducted to decrease the low-frequency drift and high-frequency noise.

To identify brain areas functionally connected to the lesion sites, an FC map was first generated using a standard voxel-wise approach with the location of the lesion in the left thalamus as the seed. Specifically, the time course within the lesion area was extracted for each control subject. Correlations between this extracted signal and all other brain voxels were identified, and one-sample t-tests were performed across all controls. Given the emphasis on particularly S1, we set the lesion relationship FC map within the mask of S1.

Then, a voxel-wise FC analysis was conducted with the non-lesion region for all subjects. The time series of all voxels within this ROI was averaged, and Pearson’s correlation between the average time series and all other voxels in the brain was computed to obtain seed-related whole brain mapping. For additional statistical analyses, the correlation coefficients were transformed to z-values through Fisher’s z transformation to improve the normality of the correlation coefficient.

***Mediation analysis***

The script written by Preacher & Hayes [14] was used to conduct a mediation analysis using SPSS 17.0 to investigate whether a mediating variable affects the relationship between an independent variable and a dependent variable. In the sensory pathway, the thalamus sends signals to S1 through the CTR. S1 mainly controls the somatosensory function of the whole body. We hypothesized that in the case of TI, the information sent by the thalamus could not be passed and result in secondary damage to the CTR, further resulting in atrophy in S1. In the statistical analyses, we conducted a mediation analysis to explore whether the relationship between the integrity of the CTR and somatosensory function was influenced by atrophic S1. We chose the FA values of the ipsilesional CTR, the volume of the ipsilesional S1 and the somatosensory score as the independent variable, the proposed mediator and the dependent variable, respectively. In addition, age, gender and ICV were entered as control variables to avoid the influence of irrelevant factors.

**Results**

***Differences in diffusion indices between TI patients and controls***

The results are shown in the following table.

Table S1. Differences in the diffusion index between patients with TI and controls

| Diffusion index | Controls | TI group | F value | *p*-value |
| --- | --- | --- | --- | --- |
| FA | 0.58±0.20 | 0.55±0.30 | 18.634 | ＜0.001 |
| MD（×10-4mm2s-1） | 8.20±0.53 | 8.74±0.65 | 18.673 | ＜0.001 |
| AD（×10-4mm2s-1） | 12.49±0.49 | 12.95±0.63 | 14.356 | ＜0.001 |
| RD（×10-4mm2s-1） | 6.05±0.70 | 6.63±0.69 | 16.985 | ＜0.001 |

Note—Continuous data are presented as the mean ± SD.

**References**

1. Wardlaw JM, Smith EE, Biessels GJ et al (2013) Neuroimaging standards for research into small vessel disease and its contribution to ageing and neurodegeneration. Lancet Neurol 12:822-838

2. Fazekas F, Kleinert R, Offenbacher H et al (1993) Pathologic correlates of incidental MRI white matter signal hyperintensities. Neurology 43:1683-1689

3. Basser PJ, Mattiello J, LeBihan D (1994) Estimation of the effective self-diffusion tensor from the NMR spin echo. J Magn Reson B 103:247-254

4. Gong G, He Y, Concha L et al (2009) Mapping anatomical connectivity patterns of human cerebral cortex using in vivo diffusion tensor imaging tractography. Cereb Cortex 19:524-536

5. Fischl B (2012) FreeSurfer. Neuroimage 62:774-781

6. Fischl B, Salat DH, Busa E et al (2002) Whole brain segmentation: automated labeling of neuroanatomical structures in the human brain. Neuron 33:341-355

7. Segonne F, Dale AM, Busa E et al (2004) A hybrid approach to the skull stripping problem in MRI. Neuroimage 22:1060-1075

8. Sled JG, Zijdenbos AP, Evans AC (1998) A nonparametric method for automatic correction of intensity nonuniformity in MRI data. IEEE Trans Med Imaging 17:87-97

9. Fischl B, Liu A, Dale AM (2001) Automated manifold surgery: constructing geometrically accurate and topologically correct models of the human cerebral cortex. IEEE Trans Med Imaging 20:70-80

10. Segonne F, Pacheco J, Fischl B (2007) Geometrically accurate topology-correction of cortical surfaces using nonseparating loops. IEEE Trans Med Imaging 26:518-529

11. Dale AM, Fischl B, Sereno MI (1999) Cortical surface-based analysis. I. Segmentation and surface reconstruction. Neuroimage 9:179-194

12. Fischl B, Dale AM (2000) Measuring the thickness of the human cerebral cortex from magnetic resonance images. Proc Natl Acad Sci U S A 97:11050-11055

13. KJ Friston SW, Howard R (1996) Movement‐related effects in fMRI time‐series. Magn Reson Med 35:346-55.

14. Preacher KJ, Hayes AF (2008) Asymptotic and resampling strategies for assessing and comparing indirect effects in multiple mediator models. Behav Res Methods 40:879-891
